# Supplementary material
Source: ML conference proceedings conference paper supplement (https://openaccess.thecvf.com/content/CVPR2023/html/Yi_MIME_Human-Aware_3D_CVPR_2023_paper.html)
Supplement: Supplementary file 1 [file Yi_MIME_Human-Aware_3D_CVPR_2023_supplemental.zip]

Archive with 4 entries (4 files):
- MIME_supmat_final-min.pdf
- __MACOSX/._MIME_supmat_final-min.pdf
- perceivingsyste - MIME-0323_cameraReady_fastCMP.mp4
- __MACOSX/._perceivingsyste - MIME-0323_cameraReady_fastCMP.mp4
